# Supplementary material
Source: PubMed Central journal article supplement (PMC4637227)
Supplement: NIHMS715412-supplement-01.pdf [file NIHMS715412-supplement-01.pdf]

### Supplemental Table: Univariate Analyses of Potential Risk Factors

Factors shown in bold have 95% confidence intervals on the hazard ratio that exclude 1.

| Factor                    | Level      | Patients  | PFS Events | Median PFS  | HR          | 95% CI             |
|---------------------------|------------|-----------|------------|-------------|-------------|--------------------|
| Bone Metastases           | No         | 59        | 53         | 2.27        |             |                    |
|                           | Yes        | 39        | 27         | 3.58        | 0.90        | 0.56 – 1.44        |
| Liver Metastases          | No         | 77        | 63         | 3.12        |             |                    |
|                           | Yes        | 21        | 17         | 2.07        | 1.26        | 0.73 -2.18         |
| <b>Lung Metastases</b>    | <b>No</b>  | <b>40</b> | <b>32</b>  | <b>3.61</b> |             |                    |
|                           | <b>Yes</b> | <b>58</b> | <b>48</b>  | <b>2.17</b> | <b>1.72</b> | <b>1.06 – 2.80</b> |
| Any Visceral Mets         | No         | 10        | 10         | 1.91        |             |                    |
|                           | Yes        | 88        | 70         | 2.30        | 1.37        | 0.69 – 2.72        |
| Renal Hilar Metastases    | No         | 93        | 75         | 2.27        |             |                    |
|                           | Yes        | 5         | 5          | 2.30        | 0.79        | 0.32 – 1.98        |
| <b>Pleural Metastases</b> | <b>No</b>  | <b>90</b> | <b>73</b>  | <b>3.12</b> |             |                    |
|                           | <b>Yes</b> | <b>8</b>  | <b>7</b>   | <b>1.91</b> | <b>2.60</b> | <b>1.14 – 5.93</b> |
| Subcutaneous Metastases   | No         | 95        | 77         | 2.27        |             |                    |
|                           | Yes        | 3         | 3          | 3.22        | 1.31        | 0.41 – 4.20        |
| <b>Lymph Node Mets</b>    | <b>No</b>  | <b>63</b> | <b>52</b>  | <b>3.19</b> |             |                    |
|                           | <b>Yes</b> | <b>35</b> | <b>28</b>  | <b>2.07</b> | <b>1.74</b> | <b>1.07 – 2.82</b> |
| Mets at Other Site        | No         | 65        | 54         | 2.30        |             |                    |
|                           | Yes        | 33        | 26         | 2.27        | 0.89        | 0.55 – 1.44        |
| Measurable Disease        | No         | 74        | 63         | 2.17        |             |                    |
|                           | Yes        | 24        | 17         | 3.61        | 0.69        | 0.40 – 1.20        |
| Prior Immunotherapy       | No         | 54        | 46         | 2.17        |             |                    |
|                           | Yes        | 44        | 34         | 3.61        | 0.72        | 0.46 – 1.12        |
| Prior Nephrectomy         | No         | 13        | 9          | 3.45        |             |                    |
|                           | Yes        | 85        | 71         | 2.27        | 0.98        | 0.49 – 1.99        |
| Sex                       | Male       | 68        | 56         | 2.27        |             |                    |
|                           | Female     | 30        | 24         | 2.30        | 1.07        | 0.66 – 1.74        |
| Clear Cell Histology      | No         | 34        | 29         | 2.04        |             |                    |
|                           | Yes        | 64        | 51         | 2.89        | 0.64        | 0.40 – 1.02        |
| MSKCC Risk Factors        | 0          | 37        | 36         | 3.19        |             |                    |
|                           | 1          | 53        | 39         | 2.14        | 1.37        | 0.86 – 2.18        |
|                           | 2          | 8         | 5          | 3.61        | 0.99        | 0.38 – 2.54        |
